# Supplementary material for: Mapping mining-affected water pollution in China: status, patterns, risks, and implications
Source: Copernicus journal article supplement (doi:10.5194/hess-29-3957-2025), 2025-08-26
Supplement: Supplementary file 1 [file hess-29-3957-2025-supplement.zip]

## Sheet: Table S1
Table S1 Typical coal and metal mines in China
ID	Province	Mine name	Mine type	Sample size	Sampling year	Sampling month
1	Anhui	Banji	Coal mine	16	2022 ~ 2023	Mar ~ Jul
2	Anhui	Chaoshan	Gold mine	1	2012	Feb
3	Anhui	Dingji	Coal mine	43	2022	-
4	Anhui	Gubei	Coal mine	71	2022	-
5	Anhui	Guqiao	Coal mine	59	2023	-
6	Anhui	Haizi	Coal mine	3	2014	Jun
7	Anhui	Huainan	Coal mine	21	2019	Mar
8	Anhui	Jiegou	Coal mine	1	2014	Jun
9	Anhui	Jiguanshan	Copper mine	2	2010	Jul
10	Anhui	Jinkouling tailing pond	Copper mine	1	2012	Feb
11	Anhui	Linhuan	Coal mine	12	2014 / 2015 / 2016 / 2017 / 2020	Jul / Apr & Jul / Jan / Dec / Jul
12	Anhui	Nanshan	Iron mine	115	2010 / 2013 / 2014 / 2015 / 2016 / 2018 / 2019 / 2021	Jun / Sep & Dec / May & Aug / Oct / Jan & May & Jun & Nov & Dec / Oct / Jul & Dec / May
15	Anhui	Paner	Coal mine	60	2021	Sep ~ Oct
13	Anhui	Panji	Coal mine	26	2020	Dec
16	Anhui	Pansan	Coal mine	101	2020 / 2022	Aug / -
17	Anhui	Panxie	Coal mine	65	2012 / 2021	Dec / -
14	Anhui	Panyi	Coal mine	115	2017	-
18	Anhui	Qianyingzi	Coal mine	80	2021	-
19	Anhui	Qingdong	Coal mine	59	2014 / 2017 / 2018	Jun / May / -
20	Anhui	Renlou	Coal mine	49	1999 ~ 2006 / 2009 ~ 2015 / 2017	-
21	Anhui	Shizishan	Copper mine	92	2016 / 2017	Jun / Dec
22	Anhui	Shizishan-Xinqiao	Polymetallic mine	13	2018	Sep
23	Anhui	Shuimuchong tailing pond	Copper mine	1	2012	Feb
24	Anhui	Suixiao	Coal mine	4	2020	Jul
25	Anhui	Sunan	Coal mine	39	2022 / 2023	-
26	Anhui	Suntuan	Coal mine	2	2014	Jul
27	Anhui	Suxian	Coal mine	6	2020	Jul
28	Anhui	Tianmashan	Gold mine	40	2024	Jul
29	Anhui	Tongguanshan tailing pond	Copper mine	1	2012	Feb
30	Anhui	Tongting	Coal mine	1	2014	Jul
31	Anhui	Wolonghu	Coal mine	30	2012	Sep
32	Anhui	Wugou	Coal mine	11	2015	-
33	Anhui	Xiangshan	Pyrite mine	5	2009 / 2010	Jun / Oct
34	Anhui	Xiangshuichong tailing pond	Copper mine	3	2010	Jun
35	Anhui	Xiangsigu tailing pond	Copper mine	1	2013	-
36	Anhui	Xinqiao	Pyrite mine	3	2013	-
37	Anhui	Xutuan	Coal mine	31	2005 ~ 2008 / 2011 ~ 2014 / 2017	-
38	Anhui	Yangliu	Coal mine	2	2014	Jul
39	Anhui	Yangshanchong tailing pond	Copper mine	6	2010 / 2012	Jun / Feb
40	Anhui	Yangzhuang	Coal mine	10	2018	Jun
41	Anhui	Yuaner	Coal mine	51	2012 ~ 2020	-
42	Anhui	Yuanyi	Coal mine	1	2014	Jul
43	Anhui	Zhongshan tailing pond	Iron mine	11	2017	Jul
44	Chongqing	Songzao	Coal mine	10	2016	Oct
45	Fujian	Linkeng	Coal mine	5	2023	Oct
46	Fujian	Shangjing	Coal mine	3	2003	-
47	Fujian	Yongan	Coal mine	3	2003	-
48	Fujian	Zijinshan	Copper mine	22	2010 / 2015 / 2018 / 2020	Oct / - / Oct / -
49	Gansu	Baiyin	Copper mine	10	2005 / 2016 / 2017	Aug
50	Guangdong	-	Lead-zinc mine	3	2018	-
51	Guangdong	Dabaoshan	Polymetallic mine	526	2004 / 2005 / 2006 / 2007 / 2009 / 2010 / 2012 / 2013 / 2014 / 2015 / 2016 / 2017 / 2018 / 2019 / 2020 / 2022 / 2023	Dec / Jun ~ Aug & Oct ~ Nov / Feb & Apr & Jun / Jan ~ May / Jun / Oct / Jul & Nov & Dec / Jun & Aug & Nov / Jan & May & Oct / Aug & Dec / Jun ~ Aug / Jan / Oct / Jan & Jun / May / May & Jul / May & Jul
52	Guangdong	Fankou	Lead-zinc mine	3	2010	Oct
53	Guangdong	Lechang	Lead-zinc mine	2	2004 / 2010	Sep / Oct
54	Guangdong	Shirenzhang	Tungsten mine	5	2022	Jun
55	Guangdong	Shuilongwei	Lead-zinc mine	28	2021	Aug / Dec
56	Guangdong	Yunfu	Pyrite mine	103	2004 / 2005 / 2006 / 2010 / 2013 / 2014 / 2019 / 2021	Dec / Apr & Jul & Oct / - / Oct / Nov / Mar / Jul ~ Dec / Oct
57	Guangxi	Dachang	Lead-zinc mine	12	2006 / 2010	Aug
58	Guangxi	Daxin	Lead-zinc mine	3	2014	-
59	Guangxi	Gaofeng	Lead-zinc mine	2	2014	-
60	Guangxi	Gulan	Lead-zinc mine	1	2014	-
61	Guangxi	Heshan	Coal mine	2	2013	Oct
62	Guangxi	Huanjiang	Lead-zinc mine	1	2014	-
63	Guangxi	Lida	Lead-zinc mine	1	2014	-
64	Guangxi	Lifa	Lead-zinc mine	1	2014	-
65	Guangxi	Lujing	Lead-zinc mine	1	2014	-
66	Guangxi	Nandan	Lead-zinc mine	2	2014	-
67	Guangxi	Panlong	Lead-zinc mine	1	2014	-
68	Guangxi	Pingnan	Lead-zinc mine	1	2014	-
69	Guangxi	Shanglin	Lead-zinc mine	3	2014	-
70	Guangxi	Tongkeng	Lead-zinc mine	1	2014	-
71	Guangxi	Wuxu	Lead-zinc mine	1	2014	-
72	Guangxi	Xinxingwang	Lead-zinc mine	1	2014	-
73	Guangxi	Zhanggongling	Lead-zinc mine	1	2014	-
74	Guizhou	Anhong	Coal mine	1	2013	-
75	Guizhou	Bamaoping	Coal mine	2	2017 / 2020	Jul / -
76	Guizhou	Banpo	Coal mine	4	2017 / 2020	Jul / -
77	Guizhou	Banpo	Antimony mine	22	2013	Jun / Nov / Dec
78	Guizhou	Bijie	Coal mine	3	2010	-
79	Guizhou	Chashan	Coal mine	1	2013	-
80	Guizhou	Chetian River Basin	Coal mine	239	2020 / 2021	Aug & Nov & Dec / Jan & Apr ~ Nov
81	Guizhou	Congjiang	Antimony mine	3	2017	May
82	Guizhou	Dafang	Coal mine	3	2016	Jul ~ Aug
83	Guizhou	Dahebian	Coal mine	2	2010	-
84	Guizhou	Dajing	Lead-zinc mine	2	2011	Jan
85	Guizhou	Damaoshan	Coal mine	1	2017	Jul
86	Guizhou	Dapo	Coal mine	2	2013	Sep
87	Guizhou	Dayuan	Coal mine	1	2013	-
88	Guizhou	Dushan	Coal mine	2	2016	Jul ~ Aug
89	Guizhou	Dushan	Antimony mine	24	2017	May
90	Guizhou	Duyun	Coal mine	3	2016	Jul ~ Aug
91	Guizhou	Erhai	Coal mine	1	2013	-
92	Guizhou	Feilong	Coal mine	1	2018	Jun
93	Guizhou	Fenggang	Coal mine	4	2016	Jul ~ Aug
94	Guizhou	Fenghuangshan	Coal mine	16	2013 / 2017	- / Jun
95	Guizhou	Fuquan	Coal mine	2	2016	Jul ~ Aug
96	Guizhou	Gouchang	Coal mine	1	2013	-
97	Guizhou	Guanling	Coal mine	2	2016	Jul ~ Aug
98	Guizhou	Guanshanhu	Coal mine	2	2016	Jul ~ Aug
99	Guizhou	Hezhang	Coal mine	4	2016	Jul ~ Aug
100	Guizhou	Hongfa	Coal mine	8	2017	Jun
101	Guizhou	Hongsheng	Coal mine	3	2010	-
102	Guizhou	Hongyanjiao	Coal mine	16	-	May
103	Guizhou	Huaxi Creek	Coal mine	7	2015	Jun
104	Guizhou	Huichuan	Coal mine	1	2016	Jul ~ Aug
105	Guizhou	Huishui	Coal mine	2	2016	Jul ~ Aug
106	Guizhou	Jianghe	Coal mine	1	2020	-
107	Guizhou	Jiangkou	Coal mine	3	2017 / 2020	Jul / -
108	Guizhou	Jiaole	Coal mine	209	2008 / 2009 / 2010 / 2016 / 2018	Dec / Sep / Sep / Dec / -
109	Guizhou	Jinsha	Coal mine	319	2016 / 2020 / 2021 / 2023	Jul ~ Aug / Nov ~ Dec / Jan ~ Nov / -
110	Guizhou	Jiujiadong	Coal mine	7	2010	-
111	Guizhou	Kaili	Coal mine	23	2016 / 2022	Jul ~ Aug / -
112	Guizhou	Lanmuchang	Thallium-Hydrargyrum mine	7	1998 / 2016	Oct ~ Dec / May
113	Guizhou	Libo	Coal mine	6	2016	Jul ~ Aug
114	Guizhou	Liuzhi	Coal mine	1	2016	Jul ~ Aug
115	Guizhou	Longchang	Coal mine	2	2020	-
116	Guizhou	Longgong	Coal mine	1	2013	-
117	Guizhou	Longli	Coal mine	1	2016	Jul ~ Aug
118	Guizhou	Maiping	Coal mine	22	2008 / 2009	Mar & May & Jul & Sep / -
119	Guizhou	Majiang	Coal mine	65	2016 / 2018 / 2019 / 2022	Jul ~ Aug / Aug ~ Dec / Jan / Jun & Nov
120	Guizhou	Meitan	Coal mine	1	2016	Jul ~ Aug
121	Guizhou	Nayong	Coal mine	4	2016	Jul ~ Aug
122	Guizhou	Panzhou	Coal mine	5	2016	Jul ~ Aug
123	Guizhou	Pingba	Coal mine	6	2016	Jul ~ Aug
124	Guizhou	Pingdi	Coal mine	1	2020	-
125	Guizhou	Pingluhe	Coal mine	1	2017	Jul
126	Guizhou	Pingtang	Coal mine	2	2016	Jul ~ Aug
127	Guizhou	Puan	Coal mine	3	2009	-
128	Guizhou	Puding	Polymetallic mine	7	2010	Aug
129	Guizhou	Qianxi	Coal mine	3	2016	Jul ~ Aug
130	Guizhou	Qiaotou	Coal mine	1	2017	Jul
131	Guizhou	Qingganglin	Coal mine	1	2010	-
132	Guizhou	Qinglong	Coal mine	3	2016	Jul ~ Aug
133	Guizhou	Qingshan	Lead-zinc mine	5	2011	Jan
134	Guizhou	Qingzhen	Coal mine	2	2016	Jul ~ Aug
135	Guizhou	Qituo	Coal mine	1	2013	-
136	Guizhou	Qixingguan	Coal mine	2	2016	Jul ~ Aug
137	Guizhou	Renhuai	Coal mine	5	2016	Jul ~ Aug
138	Guizhou	Rongjiang	Antimony mine	19	2017	May
139	Guizhou	Sandu	Antimony mine	22	2017	May
140	Guizhou	Sangda	Coal mine	1	2013	-
141	Guizhou	Sanjiazhai	Coal mine	1	2013	-
142	Guizhou	Shunfa	Coal mine	1	2017	Jul
143	Guizhou	Suiyang	Coal mine	7	2016 / 2021	Jul ~ Aug / Oct
144	Guizhou	Tongzi	Coal mine	8	2016	Jul ~ Aug
145	Guizhou	Wanli-Qinggangao	Coal mine	1	2017	Jul
146	Guizhou	Weining	Coal mine	4	2016	Jul ~ Aug
147	Guizhou	Wengan	Coal mine	2	2016	Jul ~ Aug
148	Guizhou	Xiangqi	Coal mine	1	2017	Jul
149	Guizhou	Xiangshui	Coal mine	1	2013	-
150	Guizhou	Xiangxing	Coal mine	1	2013	-
151	Guizhou	Xinggui	Coal mine	1	2013	-
152	Guizhou	Xingren	Coal mine	150	2005 / 2006 / 2009 / 2015 / 2016 / 2017 / 2019	Apr / Jul / - / May / Jul ~ Aug / Oct / Sep
153	Guizhou	Xinyuan	Coal mine	1	2013	-
154	Guizhou	Xishui	Coal mine	8	2016	Jul ~ Aug
155	Guizhou	Xixiu	Coal mine	4	2016	Jul ~ Aug
156	Guizhou	Yangliu Street	Coal mine	3	2015	Jul
157	Guizhou	Yifa	Coal mine	1	2013	-
158	Guizhou	Yudong	Coal mine	2	2017 / 2020	Jul / -
159	Guizhou	Yudong River Basin	Coal mine	100	2017 / 2018 / 2020	Jul & Dec / Mar & Aug / -
160	Guizhou	Yuqing	Coal mine	1	2016	Jul ~ Aug
161	Guizhou	Zhenfeng	Coal mine	2	2016	Jul ~ Aug
162	Guizhou	Zhijin	Coal mine	300	2007 / 2009 / 2013 / 2014 / 2015 / 2016 / 2017 / 2018 / 2019	Apr & Oct / - / Jul / Nov / Apr / Jul ~ Aug / Jan / Mar ~ Dec / Jan ~ Mar
163	Guizhou	Zhongling	Coal mine	1	2013	-
164	Guizhou	Zhongshan	Coal mine	3	2016	Jul ~ Aug
165	Guizhou	Zhongtian	Coal mine	1	2013	-
166	Hainan	Shilu	Hematite mine	1	2010	Jul
167	Hebei	Fengfeng	Coal mine	65	1980 / 1996 / 2007 / 2012 / 2017 / 2013 ~ 2014	- / - / - / - / - / Apr ~ Sep
168	Hebei	Handan	Coal mine	28	2018	Sep
169	Hebei	Zhongguan	Pyrite mine	39	2021	Jul
170	Henan	Jiaozuo	Coal mine	104	2008 / 2022 / 2023	Aug & Oct / - / -
171	Henan	Pingdingshan	Coal mine	55	2019	-
172	Hubei	Daye	Copper mine	39	2021	Mar
173	Hubei	Gaolan	Pyrite mine	2	2006 / 2007	Sep & Nov / Jan & Mar & May & Jul
174	Hubei	Tonglushan	Copper mine	3	2006	-
175	Hubei	Tongshankou	Copper mine	30	2005 / 2020	Jul / Oct ~ Dec
176	Hubei	Xianju	Pyrite mine	5	2017	Dec
177	Hunan	Hejiacun	Uranium mine	10	2006	Aug
178	Hunan	Shaodong	Coal mine	1	2022	-
179	Hunan	Shengli	Coal mine	8	2020	Apr & May & Nov & Dec
180	Hunan	Shimen	Coal mine	4	2015	Oct
181	Hunan	Xikuangshan	Antimony mine	202	2006 / 2013 / 2014 / 2016 / 2019 / 2022	Nov / Jul / Feb & Jul / Oct ~ Dec / Jan ~ Apr / Feb & Jul
182	Inner Mongolia	Bayan Obo tailing pond	Rare earth mine	78	2013	Jul & Nov
183	Inner Mongolia	Buertai	Coal mine	40	2018 ~ 2020 / 2021	-
184	Inner Mongolia	Bulianta	Coal mine	5	2018 ~ 2020	-
185	Inner Mongolia	Dongming	Coal mine	21	2020	Aug
186	Inner Mongolia	Huolinhe	Coal mine	31	2020 / 2021	May & Nov / May & Nov
187	Inner Mongolia	Longwanggou	Coal mine	106	2023	-
188	Inner Mongolia	Menkeqing	Coal mine	28	2021	Sep
189	Inner Mongolia	Mindong No.1	Coal mine	10	2017	Jul
190	Inner Mongolia	Nalinhe	Coal mine	16	2018 ~ 2020	-
191	Inner Mongolia	Shangwan	Coal mine	5	2018 ~ 2020	-
192	Inner Mongolia	Shilawusu	Coal mine	6	2022	Jan
193	Inner Mongolia	Taigemiao	Coal mine	22	2022	-
194	Inner Mongolia	Tangjiahui	Coal mine	33	2018 ~ 2020	-
195	Inner Mongolia	Wulanmulun	Coal mine	10	2018 ~ 2020	-
196	Inner Mongolia	Wulanmulun River Basin	Coal mine	42	2022	Jul ~ Aug
197	Inner Mongolia	Yimin	Coal mine	15	2016 / 2018	Aug / May
198	Jiangsu	Jiahe	Coal mine	9	2013 ~ 2014	-
199	Jiangsu	Pangzhuang	Coal mine	26	2010 / 2013 ~ 2014	-
200	Jiangsu	Qixiashan	Lead-zinc-silver mine	1	2012	-
201	Jiangsu	Shitun	Coal mine	2	2013 ~ 2014	-
202	Jiangsu	Wangzhuang	Coal mine	4	2013 ~ 2014	-
203	Jiangsu	Zhangxiaolou	Coal mine	4	2013 ~ 2014	-
204	Jiangxi	Dexing	Copper mine	80	1993 / 1994 / 2002 / 2005 / 2006 / 2007 / 2010 / 2016 / 2020 / 2021	Jun / Oct / - / Oct / Aug / - / Sep / Aug & Sep & Oct & Dec / Jul & Nov / Jul
205	Jiangxi	Dingnan	Rare earth mine	6	2015	Nov
206	Jiangxi	Dongxiang	Copper mine	1	2005	-
207	Jiangxi	Longnan	Rare earth mine	37	2020	Jun
208	Jiangxi	Tongchang	Copper mine	4	2007	Apr
209	Jiangxi	Wushan	Copper mine	1	2005	-
210	Jiangxi	Xinlong	Rare earth mine	30	2013	Dec
211	Jiangxi	Yinshan	Copper mine / Lead-zinc mine	9	2005 / 2006 / 2007	Oct / Aug / Apr
212	Jiangxi	Yongping	Copper mine	10	2005 / 2007 / 2010	- / Apr / Sep
213	Liaoning	Dagushan	Iron mine	46	2019	Apr
214	Ningxia	Yuanyanghu	Coal mine	74	2022	-
215	Qinghai	Qilian coal base	Coal mine	42	2012	Jun
216	Shaanxi	Baihe	Pyrite mine	81	2021 / 2022	Mar / Mar ~ May
217	Shaanxi	Balasu	Coal mine	5	2018 ~ 2020	-
218	Shaanxi	Binchang	Coal mine	20	1982 / 1983 / 1984 / 2012 / 2014 / 2015 / 2018	Oct / Aug / Apr ~ May / Apr & Jun & Jul & Aug & Oct & Dec / Jul ~ Sep / Jan / Dec
219	Shaanxi	Caojiatan	Coal mine	51	2018 / 2019 / 2021	Jun & Dec / Apr & Jul & Sep & Nov / Oct
220	Shaanxi	Dahaize	Coal mine	35	2018 ~ 2020 / 2022	-
221	Shaanxi	Daliuta	Coal mine	10	2018 ~ 2020	-
222	Shaanxi	Guojiawan	Coal mine	13	2018	-
223	Shaanxi	Halagou	Coal mine	29	2018 ~ 2020 / 2022	- / Aug ~ Sep
224	Shaanxi	Jinduicheng	Molybdenum mine	17	2015 / 2019 / 2020	Mar & May / Sep / -
225	Shaanxi	Jinjie	Coal mine	3	2018 ~ 2020	-
226	Shaanxi	Longde	Coal mine	36	2023	-
227	Shaanxi	Ningtiaota	Coal mine	79	2012 / 2013 / 2015 / 2017 / 2018 / 2019 / 2021 / 2022	Aug / Aug / Oct / Sep / Jun & Sep & Dec / Apr & Jul & Sep / Oct / -
228	Shaanxi	Sangshuping	Coal mine	22	2010	-
229	Shaanxi	Shenfu	Coal mine	76	2012	Sep
230	Shaanxi	Shigetai	Coal mine	6	2018 ~ 2020	-
231	Shaanxi	Wuliba	Pyrite mine	30	2021	May
232	Shaanxi	Yonglong	Coal mine	34	2009 / 2010 / 2011 / 2012 / 2017 / 2019 / 2020 / 2021	Jun & Aug / Jul & Aug & Oct & Nov & Dec / Nov & Dec / Jan / Dec / Oct & Dec / Sep & Dec / Nov
233	Shaanxi	Yuheng	Coal mine	67	2019 / 2020	Jul / -
234	Shaanxi	Yushen	Coal mine	253	2001 / 2005 / 2007 ~ 2021	-
235	Shaanxi	Yuyang	Coal mine	26	2013	Sep
236	Shaanxi-Inner Mongolia	Shendong	Coal mine	496	2013 ~ 2015 / 2020 / 2021 / 2023	- / Jul ~ Sep & Dec / Jan / -
237	Shandong	Binhu	Coal mine	25	2022	-
238	Shandong	Dongtan	Coal mine	6	2020	-
239	Shandong	Hongshan-Zhaili	Coal mine	80	2013 ~ 2015 / 2022	Sep ~ Sep / -
240	Shandong	Liangjia	Coal mine	103	2014 ~ 2019 / 2021	- / Apr
241	Shandong	Sanshandao	Gold mine	140	2009 / 2011 ~ 2014	Aug / Aug
242	Shandong	Wangchao	Coal mine	23	2022	-
243	Shandong	Xiaoyun	Coal mine	16	2022	Apr ~ May
244	Shandong	Xinglongzhuang	Coal mine	84	1964 / 1968 / 1978 ~ 1979 / 1981 ~ 1985 / 1987 ~ 1992 / 1994 ~ 2000 / 2003 / 2005 ~ 2006 / 2009 ~ 2012 / 2014 / 2016 ~ 2018	-
245	Shandong	Xinjulong	Coal mine	35	2021	May & Aug
246	Shandong	Zhaoyuan	Gold mine	44	2012	Apr
247	Shanxi	Beiyan	Coal mine	1	2023	-
248	Shanxi	Datong / Xinding / Taiyuan / Linfen / Yuncheng	Coal mine	408	2020 / 2021	Jun & Sep
249	Shanxi	Dongqu	Coal mine	12	2020	-
250	Shanxi	Dongzhou	Coal mine	1	2023	-
251	Shanxi	Duerping	Coal mine	7	2020	-
252	Shanxi	Guandi	Coal mine	8	2020	-
253	Shanxi	Gujiao	Coal mine	16	2022	Jan
254	Shanxi	Hongtuyan	Coal mine	3	2017 / 2018	Jul & Nov / Mar
255	Shanxi	Hongyuan	Coal mine	1	2023	-
256	Shanxi	Jiajiagou	Coal mine	1	1995	Aug
257	Shanxi	Linfen	Coal mine	4	2013	Nov ~ Dec
258	Shanxi	Liulin	Coal mine	1	1995	Aug
259	Shanxi	Malan	Coal mine	30	2004 / 2011 / 2020	Aug ~ Sep / May & Oct / -
260	Shanxi	Nanzhuang	Coal mine	1	2023	-
261	Shanxi	Niangziguan	Coal mine	20	2013 / 2014 / 2015 / 2019	Apr & May & Sep / Jun / Sep / Apr
262	Shanxi	Shandi River Basin	Coal mine	2	2022	-
263	Shanxi	Sitai	Coal mine	25	2002 / 2003 / 2007	Nov / Oct & Nov / -
264	Shanxi	Tunlan	Coal mine	54	2020	-
265	Shanxi	Wukuang	Coal mine	1	2023	-
266	Shanxi	Xiaogou	Coal mine	5	2017 / 2018 / 2020	Jul & Nov / Mar / May & Jun
267	Shanxi	Xiaohe	Coal mine	1	2020	May ~ Jun
268	Shanxi	Ximing	Coal mine	6	2020	-
269	Shanxi	Xingwu	Coal mine	1	1995	Aug
270	Shanxi	Xiqu	Coal mine	81	2016 / 2017 / 2020	-
271	Shanxi	Yuejin	Coal mine	1	2023	-
272	Shanxi	Zhenchengdi	Coal mine	25	2020	-
273	Shanxi	Zhongtiaoshan	Copper mine	1	2007	-
274	Sichuan	Chuanbei	Coal mine	30	2019 / 2021	Dec / -
275	Sichuan	Chuannan	Coal mine	6	2021	-
276	Sichuan	Dalaingzi	Lead-zinc mine	8	2018	Jun
277	Sichuan	Dashu	Pyrite mine	69	2019 / 2020 / 2021	Jun & Dec / Mar & Apr & Jun & Oct & Nov / Jul
278	Sichuan	Guxu	Coal mine	4	2010	-
279	Sichuan	Huangjiagou	Coal mine	57	2019	Oct
280	Sichuan	Kongjiagou	Coal mine	38	2020	May
281	Sichuan	Shiping	Pyrite mine	27	2020	Mar & May & Aug
282	Tibet	Gaize	Copper mine	12	2019 / 2021 / 2023	-
283	Tibet	Yulong	Copper mine	1	2017	-
284	Xinjiang	Balikun	Coal mine	13	2023	-
285	Xinjiang	Dananhu	Coal mine	20	2023	-
286	Xinjiang	Donggou	Coal mine	2	2020	-
287	Xinjiang	Kuangou	Coal mine	4	2022	May
288	Xinjiang	Naomaohu	Coal mine	50	2023	-
289	Xinjiang	Santanghu	Coal mine	107	2023	-
290	Xinjiang	Shihongtan	Uranium mine	19	2005	-
291	Xinjiang	Wudong	Coal mine	23	2021	Jul
292	Xinjiang	Yushuquan	Coal mine	15	2023	-
293	Yunnan	Bainiuchang	Polymetallic mine	15	2017	Sep
294	Yunnan	Gejiu	Tin mine	15	2016	Dec
295	Yunnan	Jinding	Lead-zinc mine	2	2007	-
296	Yunnan	Qujing	Coal mine	8	2014 / 2015	Dec / Jan ~ Apr
297	Yunnan	Wangjiatan	Iron mine	1	2008	Oct
298	Zhejiang	Suichang	Gold mine	1	2005	-
