# Supplementary material for: Mapping mining-affected water pollution in China: status, patterns, risks, and implications
Source: Copernicus journal article supplement (doi:10.5194/hess-29-3957-2025), 2025-08-26
Supplement: Supplementary file 1 [file hess-29-3957-2025-supplement.zip]

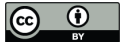

*Supplement of*

## **Mapping mining-affected water pollution in China: status, patterns, risks, and implications**

**Ziyue Yin et al.**

*Correspondence to:* Jianfeng Wu (jfwu@nju.edu.cn)

- [hess-29-3957-2025-supplement-title-page.pdf](#)
- [hess-2024-387-ESM2-version6.xlsx](#)
- [hess-2024-387-supplement-version6.pdf](#)

The copyright of individual parts of the supplement might differ from the article licence.
